# Supplementary material for: Multimodal and multifunctional stealth polymer nanospheres for sustained drug delivery
Source: Royal Society of Chemistry journal article supplement (doi:10.1039/c2nj40016b), 2012-01-01
Supplement: c2nj40016b.pdf [file c2nj40016b.pdf]

## Supporting information

# Multimodal and Multifunctional Stealth Block Copolymer Nanospheres for Sustained Drug Delivery

Cameron W. Evans, Melissa J. Latter, Diwei Ho, Tristan D. Clemons, Melinda Fitzgerald, Sarah A. Dunlop, and K. Swaminathan Iyer\*

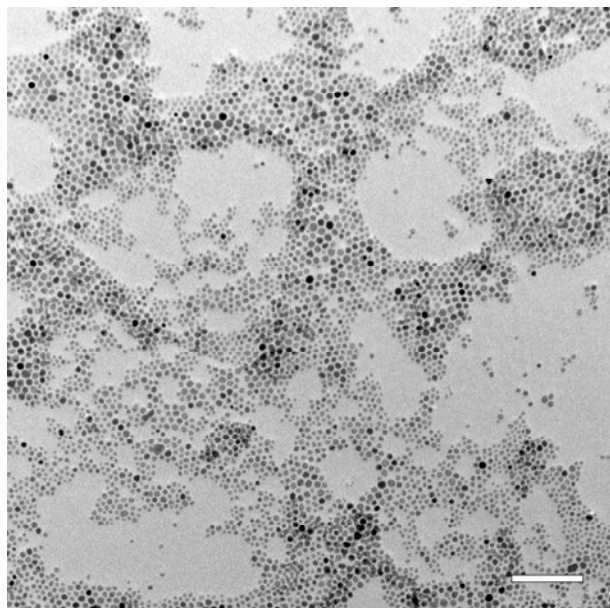

**Figure S1.** Transmission electron micrograph of as-prepared magnetite nanoparticles. Scale bar 100 nm.

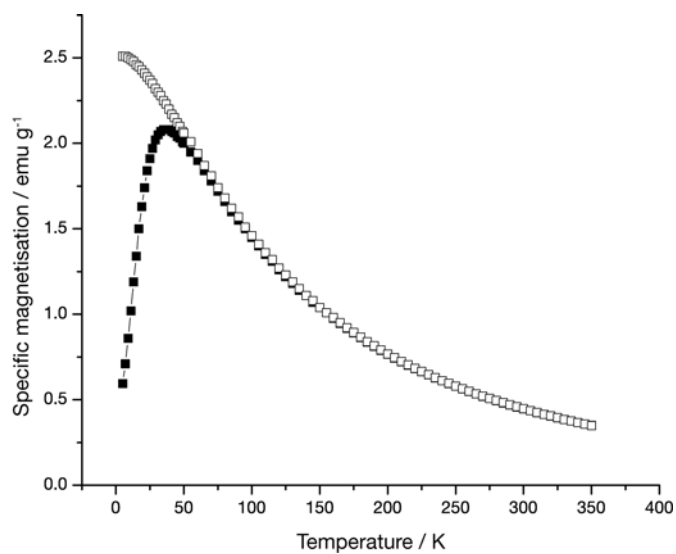

**Figure S2.** Zero-field cooled (solid)–field cooled (open) curves for PMMA nanospheres as measured by SQUID magnetometry.

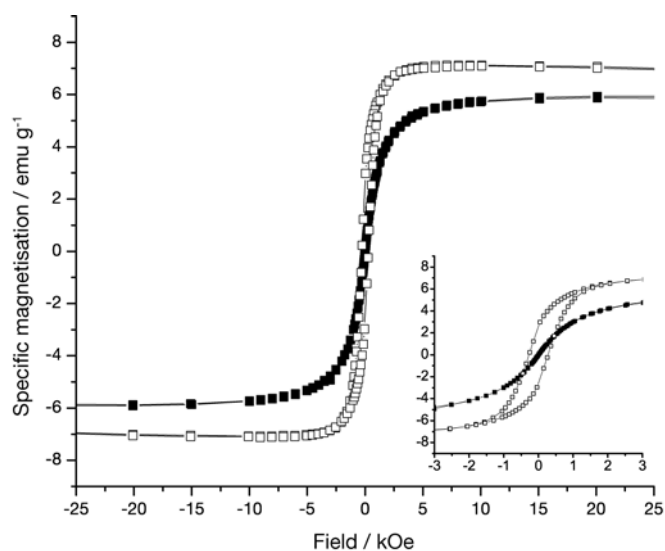

**Figure S3.** Hysteresis loops at 5 K (open) and 300 K (solid) for PMMA nanospheres, measured using SQUID magnetometry. The inset shows detail at the origin.

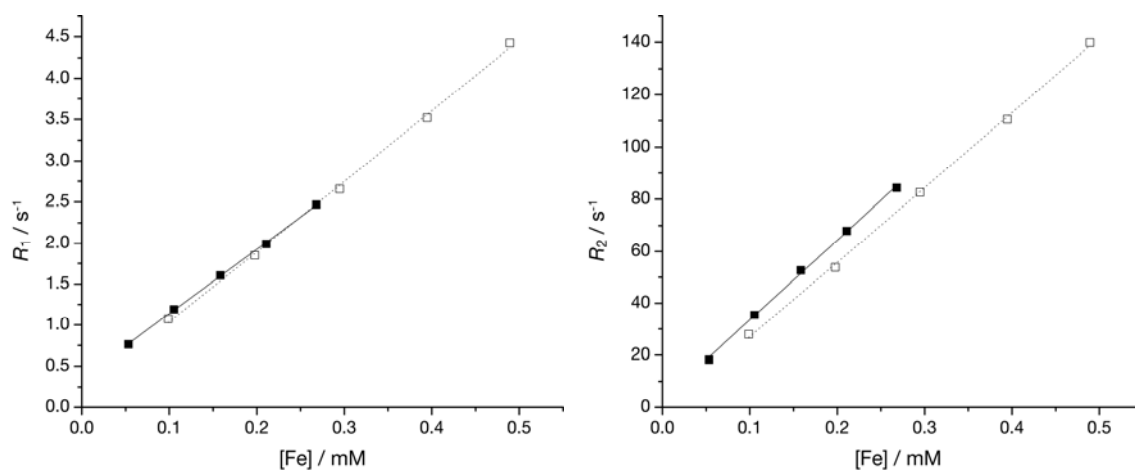

| Solvent ratio               | Longitudinal relaxivity<br>$r_1 / \text{s}^{-1} \text{mM}^{-1} \text{Fe}$ | Transverse relaxivity<br>$r_2 / \text{s}^{-1} \text{mM}^{-1} \text{Fe}$ | $r_2/r_1$ |
|-----------------------------|---------------------------------------------------------------------------|-------------------------------------------------------------------------|-----------|
| <b>1:2:9 (solid points)</b> | $7.87 \pm 0.09$                                                           | $307 \pm 6$                                                             | 39.0      |
| <b>0:1:19 (open points)</b> | $8.56 \pm 0.18$                                                           | $287 \pm 4$                                                             | 33.5      |

**Figure S4.** Determination of relaxivity for two different PMMA nanosphere preparations. Solid points denote nanosphere prepared using hexane/chloroform/acetone ratio 1:2:9, and open points represent nanospheres prepared using solvent ratio 0:1:19.
